# Supplementary material
Source: PubMed Central journal article supplement (PMC3161547)
Supplement: 1102928108_pnas.1102928108_SI.pdf [file 1102928108_pnas.1102928108_SI.pdf]

# Supporting Information

Werner et al. 10.1073/pnas.1102928108

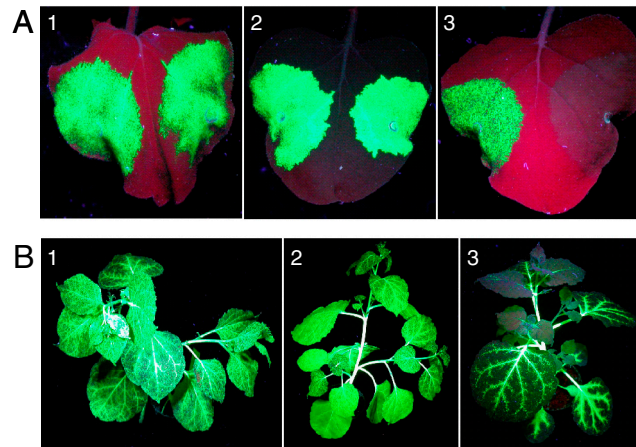

**Fig. S1.** Screening of transgenic plants. (A) pICH20592 putative transformants were infiltrated with pICH18693 (alcR; right side of each leaf) or with both pICH18693 and pICH20592 (left) as a positive control. After ethanol induction, two positive transformants (1, 2) show GFP-expression in both infiltrated areas, whereas the negative plant (3) shows GFP-expression only in the control infiltration. (B) Progeny plants (F1) from a cross between pICH18693- and pICH20592-transformants. Plants were induced with ethanol by root drenching.

Table S1. GFP fluorescence from induced and infiltrated plants

| Plant *                                         | Fluorescence units <sup>†</sup> per mg FW | Yield [mg GFP/g FW] <sup>‡</sup> |
|-------------------------------------------------|-------------------------------------------|----------------------------------|
| WT-1                                            | 0.37                                      | -                                |
| WT-2                                            | 0.47                                      | -                                |
| Noninduced-1                                    | 0.36                                      | -                                |
| Noninduced-2                                    | 0.44                                      | -                                |
| Noninduced-3                                    | 0.46                                      | -                                |
| Noninduced-4                                    | 0.50                                      | -                                |
| Induced w/o MP-1                                | 14.58                                     | 0.52                             |
| Induced w/o MP-2                                | 18.25                                     | 0.67                             |
| Induced w/o MP-3                                | 26.98                                     | 1.01                             |
| Induced w/o MP-4                                | 27.43                                     | 1.02                             |
| Induced w/o MP-5                                | 32.10                                     | 1.21                             |
| Induced w/o MP-6                                | 38.95                                     | 1.47                             |
| Induced w/o MP-7                                | 39.31                                     | 1.48                             |
| Induced w/o MP-8                                | 58.86                                     | 2.27                             |
| Induced w/o MP-9                                | 65.06                                     | 2.49                             |
| Induced w/o MP average ± SD                     |                                           | 1.35 ± 0.63                      |
| Induced with MP-1                               | 68.63                                     | 2.66                             |
| Induced with MP-2                               | 79.00                                     | 3.06                             |
| Induced with MP-3                               | 80.67                                     | 3.13                             |
| Induced with MP-4                               | 84.04                                     | 3.26                             |
| Induced with MP-5                               | 84.30                                     | 3.23                             |
| Induced with MP-6                               | 87.13                                     | 3.38                             |
| Induced with MP-7                               | 87.22                                     | 3.39                             |
| Induced with MP-8                               | 87.59                                     | 3.39                             |
| Induced with MP-9                               | 88.67                                     | 3.45                             |
| Induced with MP-10                              | 89.70                                     | 3.46                             |
| Induced with MP-11                              | 90.41                                     | 3.51                             |
| Induced with MP-12                              | 91.36                                     | 3.50                             |
| Induced with MP-13                              | 92.28                                     | 3.58                             |
| Induced with MP-14                              | 92.63                                     | 3.59                             |
| Induced with MP-15                              | 93.68                                     | 3.64                             |
| Induced with MP-16                              | 93.88                                     | 3.60                             |
| Induced with MP-17                              | 93.92                                     | 3.65                             |
| Induced with MP-18                              | 94.78                                     | 3.64                             |
| Induced with MP-19                              | 98.34                                     | 3.78                             |
| Induced with MP-20                              | 101.07                                    | 3.87                             |
| Induced with MP-21                              | 102.77                                    | 3.98                             |
| Induced with MP-22                              | 109.92                                    | 4.26                             |
| Induced with MP average ± SD                    |                                           | 3.50 ± 0.33                      |
| Infiltration 18711 on WT-plant -1               | 85.81                                     | 3.33                             |
| Infiltration 18711 on WT-plant -2               | 86.84                                     | 3.37                             |
| Infiltration 18711 on WT-plant -3               | 91.74                                     | 3.57                             |
| Infiltration 18711 on WT-plant -4               | 100.42                                    | 3.90                             |
| Infiltration 18711 on WT-plant -5               | 101.36                                    | 3.94                             |
| Infiltration 18711 on WT-plant -6               | 103.07                                    | 4.00                             |
| Infiltration 18711 on WT-plant -7               | 103.49                                    | 4.03                             |
| Infiltration 18711 on WT-plant -8               | 105.75                                    | 4.11                             |
| Infiltration pICH18711 on WT-plant average ± SD |                                           | 3.78 ± 0.29                      |
| Induced with MP leaves                          | 86.99                                     | 3.37                             |
| Induced with MP stem                            | 90.51                                     | 3.50                             |
| Infiltration 18711 on WT-plant leaves           | 142.54                                    | 5.57                             |
| Infiltration 18711 on WT-plant stem             | 0.35                                      | -                                |

Plant extracts were diluted from 1:20 to 1:100 in order to be within the linear measuring range of the instrument. Values are the average of two independent measurements

\*Plants are ordered from low to high fluorescence within each subgroup

<sup>‡</sup>Values <2 are below the detection limit

<sup>†</sup>1 fluorescence unit corresponds to 39.01 µg GFP/g FW
